# Supplementary material for: Directed plant cell-wall accumulation of iron: embedding co-catalyst for efficient biomass conversion
Source: PubMed Central journal article supplement (PMC5073452; doi:10.1186/s13068-016-0639-2), 2016-10-21
Supplement: 13068_2016_639_MOESM1_ESM.pdf [file 13068_2016_639_MOESM1_ESM.pdf]

**Manuscript title:**

**Directed plant cell wall accumulation of iron: Embedding co-catalyst for efficient biomass conversion**

**Supplemental figures.**

File type: PDF

**Contents:**

**Supplemental Figure S1.** Fe detection in in the senesced stem tissues of transgenic *Arabidopsis* plants using the Perls' Prussian blue staining.

**Supplemental Figure S2.** X-ray fluorescence microscopy (XFM) maps of Fe in cross-sections of stems in extracellular ferritin-expressing and control plants.

**Supplemental Figure S3.** Potassium and iron colocation map showing higher accumulations of iron in some of the FerEX corner compound middle lamellae.

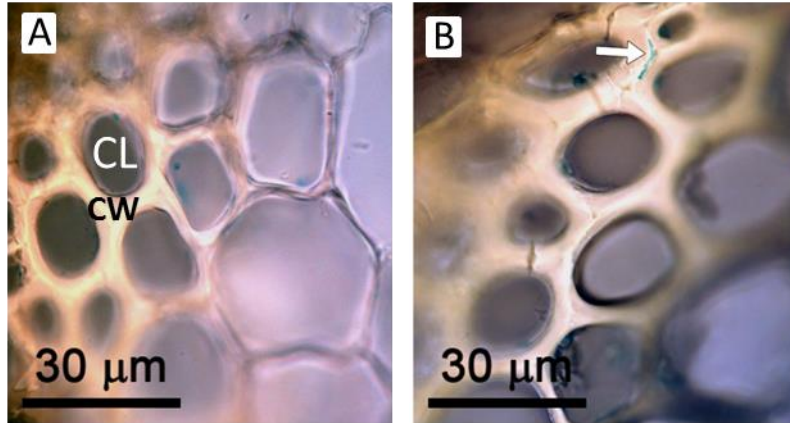

**Supplemental Figure S1. Fe detection in in the senesced stem tissues of transgenic *Arabidopsis* plants using the Perls' Prussian blue staining.** Brightfield optical microscopy showing Perls' Prussian blue staining of empty vector (EV) control (**A**), and extracellular ferritin-expressing transgenic plant shoot tissue (FerEX) (**B**). White arrow in (**B**) indicates Fe localized within the compound middle lamella. CL, cell lumen; CW, cell wall.

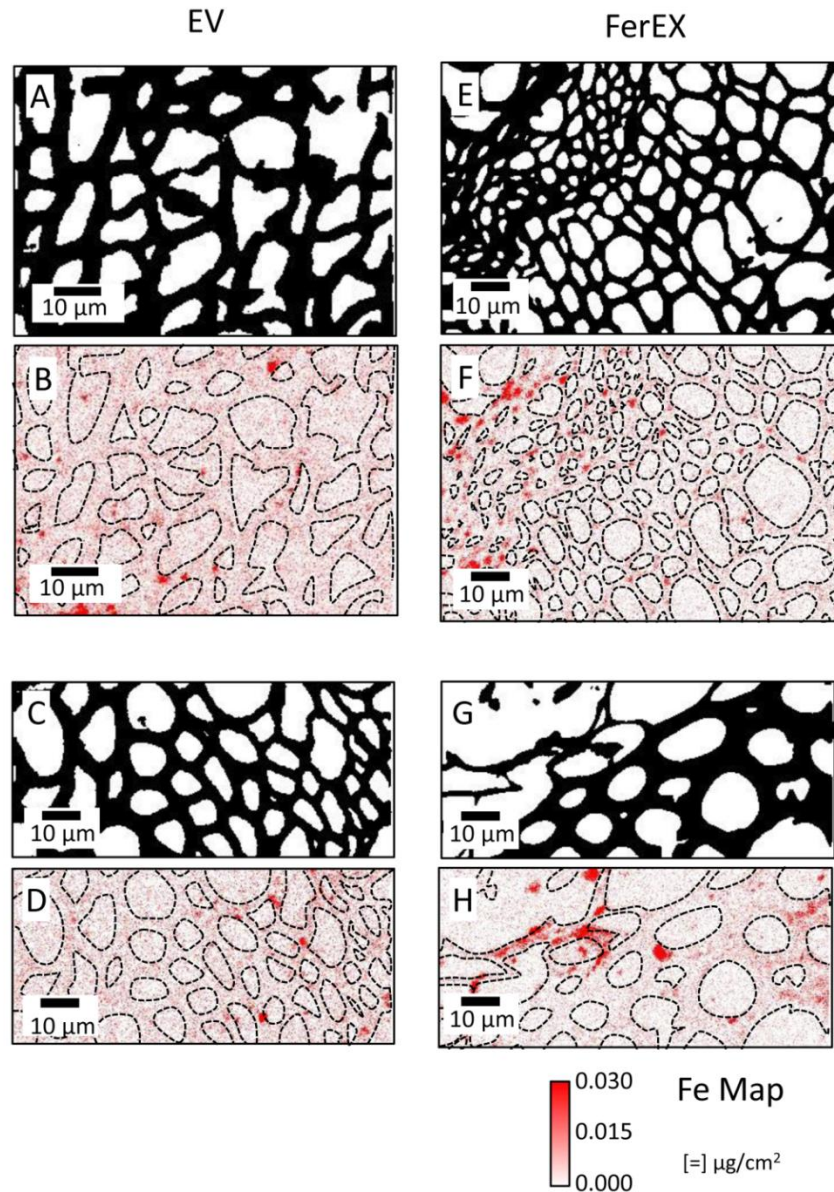

**Supplemental Figure S2. X-ray fluorescence microscopy (XFM) maps of Fe in cross-sections of stems in extracellular ferritin-expressing and control plants.** The 2-micron-thick cross-sections were cut from senesced stems from empty vector (EV) control (**A-D**) and extracellular ferritin-expressing (FerEX) (**E-H**) *Arabidopsis* plants. Cell wall images (**A**, **C**, **E**, and **G**) were constructed from binary images of potassium XFM maps. The dashed lines were drawn from the cell wall images and overlaid on the iron maps (**B**, **D**, **F**, **H**) to more easily distinguish iron intensity inside the cell walls. The intensities in all iron maps (**B**, **D**, **F**, **H**) were scaled the same and the iron can be observed in the FerEx cell walls (**F**, **H**) by noting that the iron intensity in the cell walls is higher than the background iron intensity observed in the empty cell lumina.

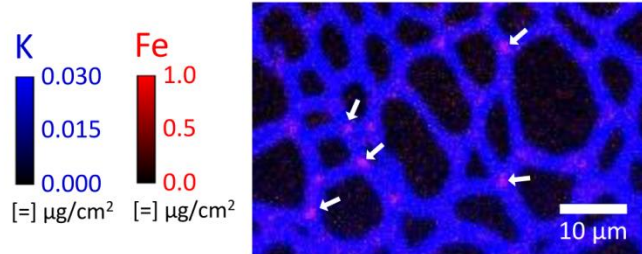

**Supplemental Figure S3. Potassium and iron colocation map showing higher accumulations of iron in some of the FerEX corner compound middle lamellae (white arrows).** The potassium and iron ion maps were obtained from 2-micron-thick cross-sections cut from FerEX senesced stems using X-ray fluorescence microscopy (XFM).
